# Supplementary material
Source: PubMed Central journal article supplement (PMC9059226)

## **Suppl Figures**

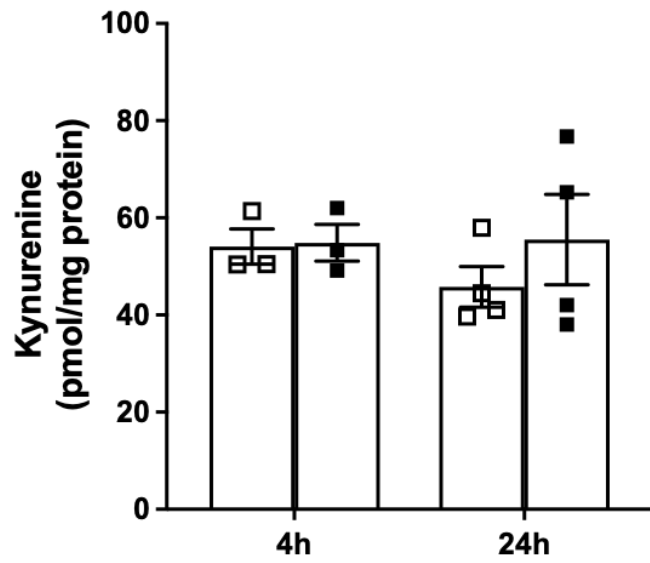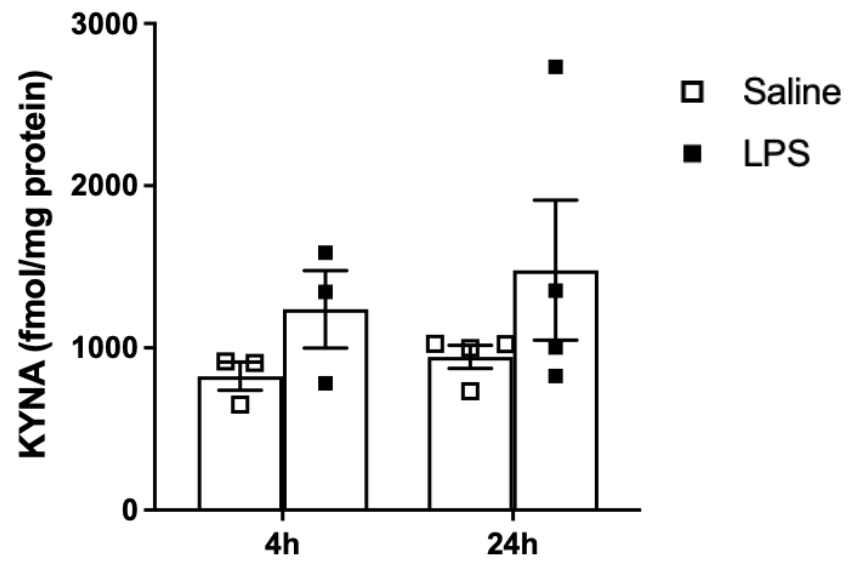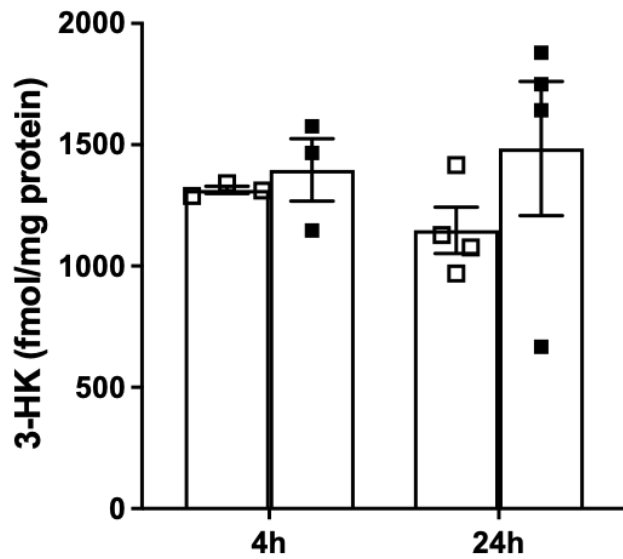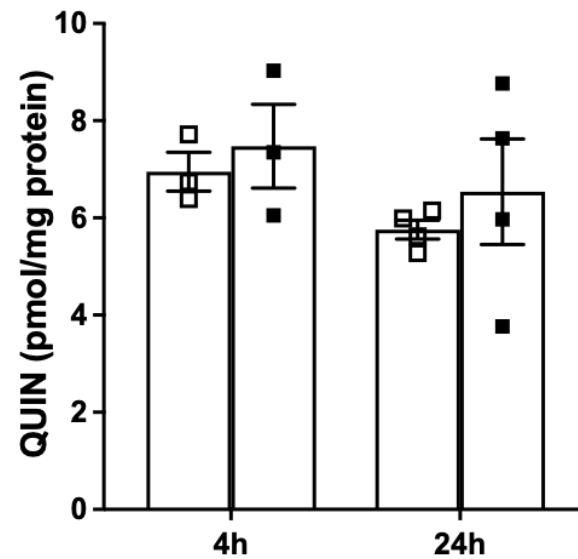

Suppl Figure 1

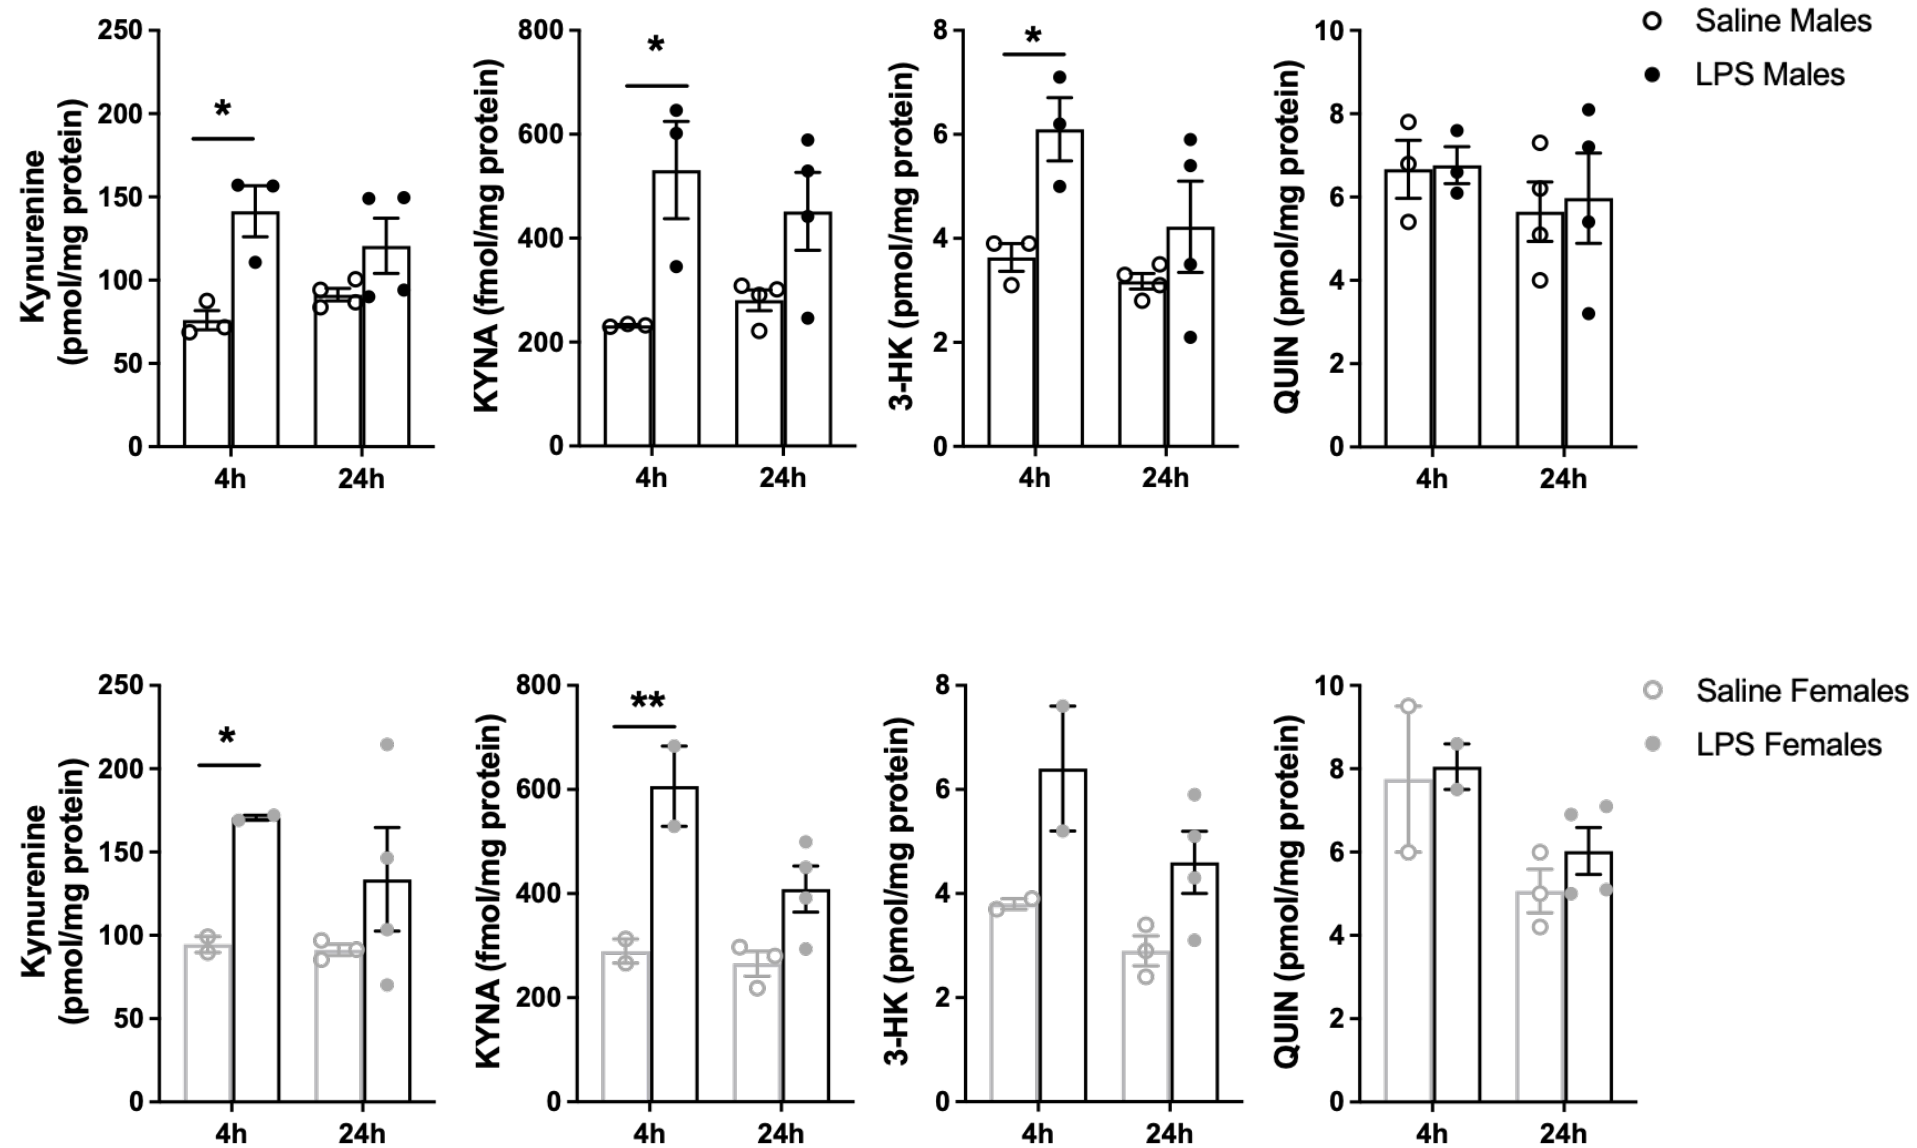

Suppl Figure 2

Supplement: NIHMS1801986-supplement-1.pdf [file NIHMS1801986-supplement-1.pdf]
